# Supplementary material
Source: publisher figshare collection journal article supplement (https://acs.figshare.com/ndownloader/files/15293981)
Supplement: Supplementary file 1 [file 15293981]

## **Supporting Information**

### **Nanoparticle Diffusion within Dilute and Semidilute Xanthan Solutions**

Kavindya K. Senanayake and Ashis Mukhopadhyay\*

*Department of Physics, Wayne State University, Detroit, MI 48201*

**\*Corresponding author. Email: [ashis@wayne.edu](mailto:ashis@wayne.edu)**

**This SI file includes 3 pages and 4 figures.**

## Figures and captions

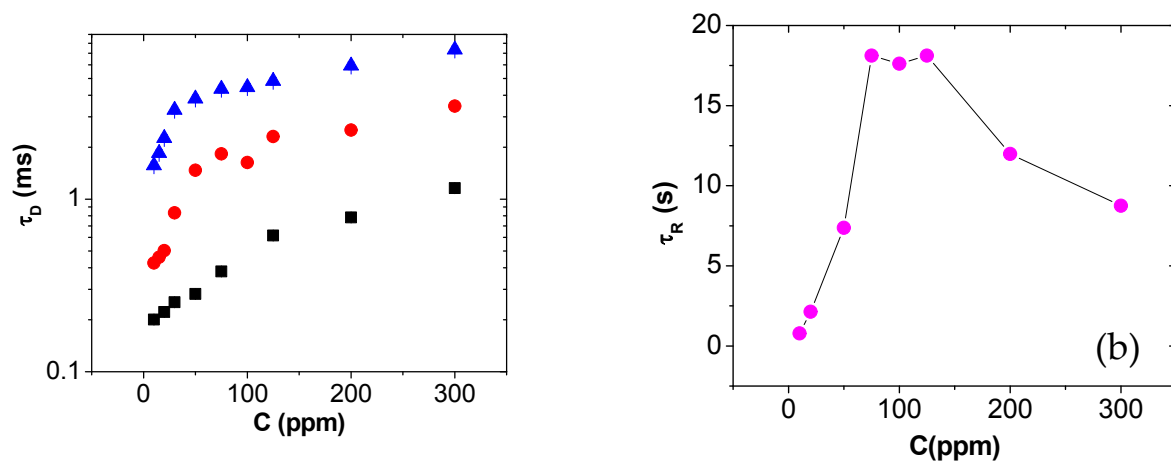

**Figure S1.** (a) Diffusive time scales of particles with  $d=5$  nm (black squares),  $d=10$  nm (red circles), and  $d=30$  nm (blue triangles) as a function of xanthan concentration. Error bars are indicated, but in some cases they were smaller than the size of the symbol. (b) polymer mesh relaxation time scale ( $\tau_R$ ) for xanthan as was determined from Ref. [10].

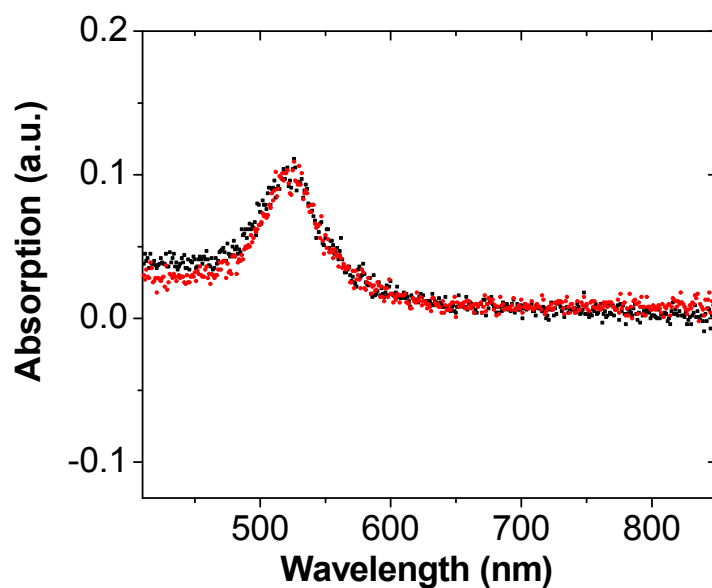

**Figure S2.** Absorption spectrum of  $d=30$  nm gold particles in water (red circles) and in 10 ppm xanthan gum (black squares) showed no shift in the absorption peak indicating no association between the gold nanoparticles and xanthan.

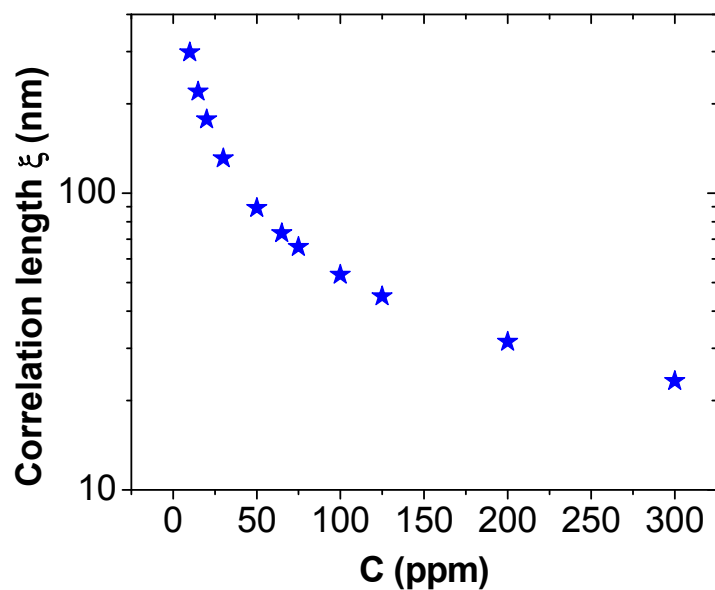

**Figure S3.** Correlation length as a function of the concentration of the xanthan solution. The correlation length decreases with polymer concentration.

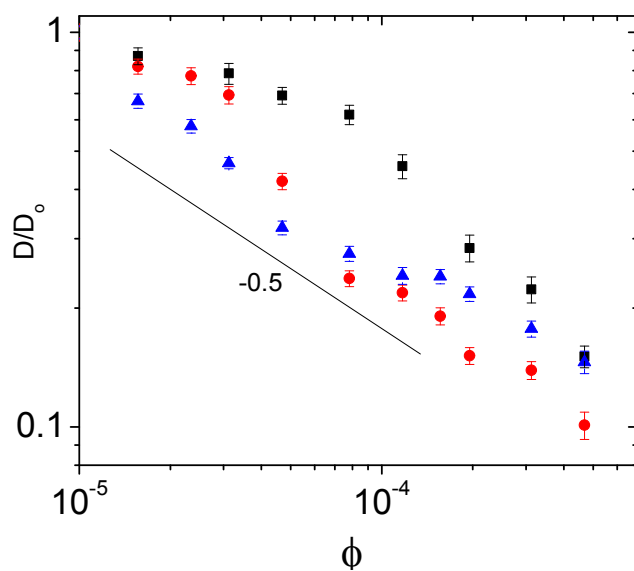

**Figure S4.** The reduced diffusion coefficient is compared with prediction of model by Altenberger *et. al*. The theory predicts  $D/D_0 \sim \phi^{-1/2}$ , which was not observed in our experiments. The symbols have the same meaning as in Fig. S1a.
